# Supplementary material for: Belimumab: a technological advance for systemic lupus erythematosus patients? Report of a systematic review and meta-analysis
Source: HighWire-hosted journal article supplement (doi:10.1136/bmjopen-2013-002852), 2013-07-01
Supplement: bmjopen-2013-002852supp_appendix.pdf [file bmjopen-2013-002852supp_appendix.pdf]

## Appendix 1

### Search Strategies

#### Cochrane Central Register of Controlled Trials (CENTRAL)

CENTRAL searched via Cochrane Library Interface on 18/05/11

|   |                                                                   |     |
|---|-------------------------------------------------------------------|-----|
| 1 | MeSH descriptor Lupus Erythematosus, Systemic explode all trees   | 418 |
| 2 | (lupus NEAR/3 erythematosus) or (systemic* NEAR/3 lupus) or (SLE) | 630 |
| 3 | (#1 OR #2)                                                        | 703 |
| 4 | belimumab OR benlysta                                             | 6   |
| 5 | (#3 AND #4)                                                       | 4   |

#### Medline

Medline searched via Ovid Interface on 19/05/11

|    |                                       |         |
|----|---------------------------------------|---------|
| 1  | exp Lupus Erythematosus, Systemic/    | 42025   |
| 2  | (lupus adj3 erythematosus).tw.        | 35497   |
| 3  | (systemic* adj3 lupus).tw.            | 31639   |
| 4  | 1 or 2 or 3                           | 50358   |
| 5  | belimumab.mp.                         | 68      |
| 6  | benlysta.mp.                          | 3       |
| 7  | 5 or 6                                | 68      |
| 8  | 4 and 7                               | 48      |
| 9  | randomized controlled trial.pt.       | 305892  |
| 10 | controlled clinical trial.pt.         | 82328   |
| 11 | randomized.ab.                        | 212836  |
| 12 | placebo.ab.                           | 124063  |
| 13 | clinical trials as topic.sh.          | 153987  |
| 14 | randomly.ab.                          | 154440  |
| 15 | trial.ti.                             | 91188   |
| 16 | 9 or 10 or 11 or 12 or 13 or 14 or 15 | 711420  |
| 17 | exp animals/ not humans.sh.           | 3582822 |
| 18 | 16 not 17                             | 656689  |
| 19 | 8 and 18                              | 24      |

RCT search filter used: Cochrane Highly Sensitive Search Strategy for identifying randomized trials in MEDLINE: sensitivity- and precision-maximizing version (2008 revision); Ovid format. Box 6.4.b in the Cochrane handbook. Reference: Higgins JPT, Green S (editors). *Cochrane Handbook for Systematic Reviews of Interventions* Version 5.1.0 [updated March 2011]. The Cochrane Collaboration, 2011. Available from [www.cochrane-handbook.org](http://www.cochrane-handbook.org)

#### Medline In-process

Medline In-Process searched via Ovid Interface on 19/05/11

|   |                                    |      |
|---|------------------------------------|------|
| 1 | exp Lupus Erythematosus, Systemic/ | 0    |
| 2 | (lupus adj3 erythematosus).tw.     | 1213 |
| 3 | (systemic* adj3 lupus).tw.         | 873  |
| 4 | 1 or 2 or 3                        | 1236 |
| 5 | belimumab.mp.                      | 8    |
| 6 | benlysta.mp.                       | 4    |
| 7 | 5 or 6                             | 10   |
| 8 | 4 and 7                            | 6    |

Embase

|    |                                   |        |
|----|-----------------------------------|--------|
| 1  | belimumab.mp.orexpbelumab/        | 427    |
| 2  | benlysta.mp.                      | 24     |
| 3  | 1 or 2                            | 428    |
| 4  | exp systemic lupus erythematosus/ | 50906  |
| 5  | (lupus adj3 erythematosus).tw.    | 40637  |
| 6  | (systemic: adj3 lupus).tw.        | 36554  |
| 7  | 4 or 5 or 6                       | 59739  |
| 8  | 3 and 7                           | 302    |
| 9  | random:.tw.                       | 632763 |
| 10 | placebo:.mp.                      | 250140 |
| 11 | double-blind:.tw.                 | 116148 |
| 12 | 9 or 10 or 11                     | 796900 |
| 13 | 8 and 12                          | 144    |

RCT search filter used: Wong, et al. (2006) Best optimization of sensitivity and specificity.  
Reference: Wong SS, Wilczynski NL, Haynes RB. Developing optimal search strategies for detecting clinically sound treatment studies in EMBASE. J Med Libr Assoc. 2006 Jan;94(1):41-7. PubMed PMID: 16404468; PubMed Central PMCID: PMC1324770.
